# Supplementary material
Source: publisher site journal article supplement (https://www.spandidos-publications.com/7568/downloadSupplementary)
Supplement: Supplementary file 1 [file downloadSupplementary]

## Sheet: Table 1
Table SI. Differentially expressed genes.
Ensembl	Gene Symbol	baseMean	log2FoldChange	padj
ENSG00000261613	AC093525.6	22.0442	4.07448	0.025963
ENSG00000243004	AC005062.1	93.2321	2.21559	0.0277625
ENSG00000253366	AC139272.1	16.1079	2.2052	0.00686031
ENSG00000162892	IL24	27.5321	1.93465	0.000106794
ENSG00000278022	AC118658.1	16.8115	1.57577	0.0327899
ENSG00000139269	INHBE	26.6659	1.38586	0.00754672
ENSG00000201302	SNORA65	21.8825	1.31148	0.0308848
ENSG00000229927	RHEBP1	213.761	1.30409	0.0120907
ENSG00000263934	SNORD3A	60.4659	1.27808	4.40929e-05
ENSG00000209082	MT-TL1	88.8609	1.01416	0.000165727
ENSG00000125538	IL1B	131.991	0.978508	3.55888e-05
ENSG00000169715	MT1E	512.496	0.809209	1.18881e-14
ENSG00000120738	EGR1	212.507	0.804829	6.27614e-07
ENSG00000241343	RPL36A	280.458	0.756082	8.72755e-09
ENSG00000184497	TMEM255B	76.2654	0.688502	0.0350874
ENSG00000220749	RPL21P28	132.158	0.650513	0.0295023
ENSG00000169629	RGPD8	116.994	0.642419	0.00602499
ENSG00000185352	HS6ST3	176.312	0.622223	0.00304519
ENSG00000130513	GDF15	1297.51	0.621255	3.54889e-20
ENSG00000127528	KLF2	126.026	0.607802	0.0190566
ENSG00000125148	MT2A	3406.54	0.605058	1.25465e-23
ENSG00000266208	AC080112.1	100.708	0.603003	0.0273112
ENSG00000269586	CT45A10	93.2663	0.58789	0.0424677
ENSG00000273373	AL355488.1	95.4585	-0.586137	0.0446283
ENSG00000186919	ZACN	101.003	-0.587034	0.0357689
ENSG00000162692	VCAM1	164.513	-0.587741	0.00445604
ENSG00000196507	TCEAL3	130.511	-0.588206	0.0105049
ENSG00000115525	ST3GAL5	413.052	-0.589939	9.55912e-06
ENSG00000116962	NID1	825.678	-0.590417	1.62339e-12
ENSG00000100908	EMC9	126.76	-0.592248	0.00892405
ENSG00000003436	TFPI	146.276	-0.593463	0.00856919
ENSG00000106976	DNM1	344.739	-0.594807	5.91205e-06
ENSG00000115414	FN1	5184.77	-0.595814	0.00156861
ENSG00000149968	MMP3	129.598	-0.597516	0.00869901
ENSG00000149260	CAPN5	111.145	-0.598878	0.0189594
ENSG00000121440	PDZRN3	303.487	-0.601401	2.94848e-06
ENSG00000232499	AL391058.1	203.099	-0.602099	0.000662139
ENSG00000168542	COL3A1	4364.58	-0.602613	1.99268e-06
ENSG00000082482	KCNK2	295.531	-0.602618	4.48871e-05
ENSG00000107201	DDX58	147.368	-0.602815	0.00437328
ENSG00000103449	SALL1	160.155	-0.603571	0.00330668
ENSG00000182179	UBA7	105.921	-0.605363	0.0171577
ENSG00000124785	NRN1	218.957	-0.606036	0.000314327
ENSG00000164118	CEP44	381.172	-0.607009	4.55277e-07
ENSG00000154277	UCHL1	441.171	-0.609454	1.21357e-07
ENSG00000149256	TENM4	185.8	-0.610757	0.000990147
ENSG00000156113	KCNMA1	381.41	-0.613272	6.7124e-07
ENSG00000186340	THBS2	289.957	-0.61628	6.3808e-06
ENSG00000169169	CPT1C	208.602	-0.617546	0.00020272
ENSG00000134853	PDGFRA	350.923	-0.618812	9.89298e-06
ENSG00000113721	PDGFRB	312.882	-0.622864	8.65258e-07
ENSG00000234287	AC099560.2	1823.21	-0.624867	8.06218e-15
ENSG00000089820	ARHGAP4	373.319	-0.626985	8.14507e-08
ENSG00000105825	TFPI2	215.047	-0.629257	0.00280866
ENSG00000137868	STRA6	84.3665	-0.630777	0.0309027
ENSG00000166923	GREM1	1300.31	-0.631171	5.90265e-20
ENSG00000182168	UNC5C	262.672	-0.631259	2.6741e-05
ENSG00000118473	SGIP1	91.6594	-0.631314	0.0488156
ENSG00000179222	MAGED1	401.603	-0.634944	2.18053e-06
ENSG00000221963	APOL6	237.101	-0.635511	5.51379e-05
ENSG00000125378	BMP4	140.473	-0.638476	0.00621977
ENSG00000218227	AC136632.1	173.719	-0.642407	0.00156861
ENSG00000275111	ZNF2	89.4016	-0.642507	0.0255493
ENSG00000220583	RPL35P2	105.243	-0.642934	0.0158878
ENSG00000144810	COL8A1	189.885	-0.643981	0.00175697
ENSG00000147251	DOCK11	273.021	-0.64448	7.14066e-06
ENSG00000071575	TRIB2	363.261	-0.645017	2.34634e-06
ENSG00000081803	CADPS2	86.8142	-0.6454	0.0233365
ENSG00000166402	TUB	108.585	-0.645707	0.0287939
ENSG00000101638	ST8SIA5	192.708	-0.645917	0.000340732
ENSG00000218336	TENM3	222.265	-0.646149	2.43006e-05
ENSG00000213856	VDAC1P2	120.051	-0.647676	0.00838393
ENSG00000240184	PCDHGC3	243.132	-0.647947	4.0508e-05
ENSG00000227051	C14orf132	417.952	-0.648032	8.92525e-08
ENSG00000267280	TBX2-AS1	109.153	-0.649916	0.0112233
ENSG00000143320	CRABP2	275.728	-0.650286	4.3065e-06
ENSG00000249087	ZNF436-AS1	81.099	-0.650877	0.044794
ENSG00000156587	UBE2L6	219.89	-0.652036	0.000223223
ENSG00000171488	LRRC8C	162.913	-0.654612	0.00794031
ENSG00000196440	ARMCX4	85.8424	-0.654771	0.0238864
ENSG00000111801	BTN3A3	82.1975	-0.655759	0.0300275
ENSG00000171951	SCG2	1335.39	-0.660106	1.73476e-15
ENSG00000126803	HSPA2	228.224	-0.661048	2.26623e-05
ENSG00000169213	RAB3B	150.757	-0.664056	0.00151305
ENSG00000124839	RAB17	95.5498	-0.666135	0.0129195
ENSG00000148468	FAM171A1	170.223	-0.666287	0.000333777
ENSG00000171033	PKIA	85.8792	-0.66664	0.033907
ENSG00000164761	TNFRSF11B	293.498	-0.667398	2.99799e-06
ENSG00000041982	TNC	2105.98	-0.667806	8.19085e-19
ENSG00000141576	RNF157	127.305	-0.669795	0.00389298
ENSG00000143248	RGS5	4311.29	-0.670274	2.19387e-07
ENSG00000163739	CXCL1	146.931	-0.670336	0.00159571
ENSG00000115526	CHST10	85.0273	-0.67052	0.0193884
ENSG00000173926	MARCH3	87.0551	-0.673072	0.0316412
ENSG00000148143	ZNF462	167.708	-0.673686	0.000202303
ENSG00000270816	LINC00221	108.642	-0.674828	0.00500839
ENSG00000050344	NFE2L3	341.496	-0.681313	1.05571e-07
ENSG00000106333	PCOLCE	994.009	-0.683626	5.68514e-19
ENSG00000204264	PSMB8	178.769	-0.684316	0.000403138
ENSG00000176658	MYO1D	371.223	-0.686548	4.63972e-08
ENSG00000274866	RF01973	86.5751	-0.687167	0.0137887
ENSG00000185432	METTL7A	114.617	-0.688598	0.0113107
ENSG00000275180	AC048341.2	66.9076	-0.688668	0.0482681
ENSG00000171617	ENC1	131.95	-0.691795	0.00109554
ENSG00000106624	AEBP1	228.791	-0.693953	1.27844e-05
ENSG00000186469	GNG2	395.833	-0.695157	3.91592e-10
ENSG00000110492	MDK	121.18	-0.69558	0.00197483
ENSG00000173114	LRRN3	247.073	-0.69572	3.53237e-06
ENSG00000162654	GBP4	138.429	-0.70021	0.000566096
ENSG00000198959	TGM2	4911.97	-0.703204	8.90798e-31
ENSG00000162576	MXRA8	561.76	-0.703883	4.83357e-14
ENSG00000165757	JCAD	901.916	-0.709282	1.70413e-18
ENSG00000185483	ROR1	85.967	-0.709764	0.013881
ENSG00000233328	PFN1P1	109.325	-0.711295	0.00341766
ENSG00000231203	KRT8P10	91.7592	-0.712435	0.0281903
ENSG00000185904	LINC00839	81.4458	-0.715066	0.0149098
ENSG00000196628	TCF4	370.255	-0.716198	5.39986e-09
ENSG00000206384	COL6A6	221.444	-0.716662	2.48881e-06
ENSG00000213190	MLLT11	325.749	-0.721152	2.59323e-07
ENSG00000105894	PTN	66.9875	-0.72593	0.0371717
ENSG00000082397	EPB41L3	282.195	-0.733231	2.19717e-07
ENSG00000261326	LINC01355	117.097	-0.734632	0.00162331
ENSG00000242445	RPL7AP11	99.5505	-0.736519	0.00741489
ENSG00000137642	SORL1	81.6081	-0.737542	0.0138151
ENSG00000081923	ATP8B1	239.411	-0.738929	3.92134e-07
ENSG00000151790	TDO2	378.842	-0.741434	1.34049e-08
ENSG00000169550	MUC15	162.923	-0.741902	0.000102443
ENSG00000149294	NCAM1	210.815	-0.741956	9.68274e-07
ENSG00000185247	MAGEA11	112.686	-0.7454	0.00105877
ENSG00000183199	HSP90AB3P	73.4329	-0.745633	0.0192753
ENSG00000125872	LRRN4	521.078	-0.745872	2.85145e-14
ENSG00000168785	TSPAN5	160.075	-0.752091	0.000110288
ENSG00000019991	HGF	1161.8	-0.754177	4.87106e-05
ENSG00000236824	BCYRN1	141.241	-0.754245	0.000277696
ENSG00000138080	EMILIN1	2171.5	-0.754571	2.94999e-36
ENSG00000117114	ADGRL2	984.207	-0.756558	3.10113e-24
ENSG00000128591	FLNC	847.39	-0.757105	1.64947e-20
ENSG00000197635	DPP4	251.063	-0.757461	6.56749e-08
ENSG00000169902	TPST1	83.5383	-0.758437	0.00625197
ENSG00000150556	LYPD6B	102.546	-0.759083	0.0029884
ENSG00000162670	BRINP3	56.2489	-0.759766	0.0439799
ENSG00000133026	MYH10	361.727	-0.763409	4.29366e-11
ENSG00000106034	CPED1	125.429	-0.764945	0.000789404
ENSG00000109861	CTSC	227.48	-0.765681	2.78996e-07
ENSG00000181541	MAB21L2	174.529	-0.76669	7.90733e-05
ENSG00000237125	HAND2-AS1	327.126	-0.769593	1.51496e-09
ENSG00000123496	IL13RA2	482.392	-0.769731	1.21356e-09
ENSG00000236603	RANP1	74.8586	-0.770263	0.0243242
ENSG00000234961	AL133415.1	409.372	-0.773671	8.23647e-13
ENSG00000082293	COL19A1	83.9708	-0.781685	0.0109113
ENSG00000169297	NR0B1	100.301	-0.786898	0.0011702
ENSG00000254473	AL354920.1	59.4945	-0.786995	0.0251707
ENSG00000091986	CCDC80	409.048	-0.788391	8.80013e-14
ENSG00000163531	NFASC	189.891	-0.789454	2.71198e-06
ENSG00000151388	ADAMTS12	540.926	-0.792804	5.75939e-17
ENSG00000072609	CHFR	79.8189	-0.79637	0.00741489
ENSG00000070182	SPTB	94.9828	-0.79703	0.00274757
ENSG00000107551	RASSF4	51.3135	-0.797592	0.0498049
ENSG00000197147	LRRC8B	117.836	-0.797979	0.000475564
ENSG00000117228	GBP1	79.7621	-0.798048	0.0118664
ENSG00000091656	ZFHX4	99.1443	-0.798355	0.00171958
ENSG00000180801	ARSJ	72.1494	-0.799278	0.00891783
ENSG00000183580	FBXL7	82.7282	-0.807328	0.0177671
ENSG00000182492	BGN	838.549	-0.808015	4.70105e-06
ENSG00000138759	FRAS1	126.796	-0.809263	0.000249991
ENSG00000253522	MIR3142HG	255.201	-0.816421	8.13215e-08
ENSG00000174837	ADGRE1	47.0261	-0.816897	0.0444868
ENSG00000065923	SLC9A7	128.383	-0.819419	8.54432e-05
ENSG00000182636	NDN	144.618	-0.824645	2.58823e-05
ENSG00000166963	MAP1A	533.216	-0.826177	3.78077e-17
ENSG00000154027	AK5	56.1105	-0.837582	0.0221371
ENSG00000113140	SPARC	5381.98	-0.838768	1.51714e-13
ENSG00000172403	SYNPO2	132.671	-0.838776	4.93186e-05
ENSG00000157601	MX1	67.661	-0.838996	0.0147173
ENSG00000115232	ITGA4	187.359	-0.840631	1.77656e-07
ENSG00000108691	CCL2	1371.52	-0.840858	1.59991e-08
ENSG00000135074	ADAM19	253.238	-0.84412	6.29181e-08
ENSG00000103034	NDRG4	146.33	-0.844317	5.30379e-06
ENSG00000104490	NCALD	63.4663	-0.844758	0.00971877
ENSG00000137809	ITGA11	1523.33	-0.848688	7.11521e-46
ENSG00000136918	WDR38	244.032	-0.851105	2.02396e-09
ENSG00000198829	SUCNR1	577.205	-0.852686	3.00412e-14
ENSG00000131242	RAB11FIP4	42.5955	-0.854706	0.0454732
ENSG00000185745	IFIT1	101.239	-0.859662	0.000522277
ENSG00000167191	GPRC5B	86.2335	-0.870129	0.00290111
ENSG00000272661	AC021097.1	56.3788	-0.870757	0.0127934
ENSG00000138028	CGREF1	55.9893	-0.872183	0.0139553
ENSG00000188015	S100A3	98.7308	-0.873401	0.00112706
ENSG00000008311	AASS	91.9376	-0.874702	0.000648405
ENSG00000139192	TAPBPL	63.3864	-0.878471	0.00997179
ENSG00000075213	SEMA3A	98.3445	-0.879341	0.000259573
ENSG00000232774	FLJ22447	60.1174	-0.88208	0.00962864
ENSG00000006042	TMEM98	51.4562	-0.886801	0.0237373
ENSG00000272374	Z97832.2	43.0309	-0.887765	0.0498392
ENSG00000157064	NMNAT2	790.311	-0.890941	4.28839e-22
ENSG00000101333	PLCB4	114.315	-0.894889	2.6741e-05
ENSG00000138311	ZNF365	41.5872	-0.904357	0.0334312
ENSG00000131435	PDLIM4	65.6509	-0.904393	0.00863445
ENSG00000079102	RUNX1T1	51.4807	-0.909744	0.0204749
ENSG00000112837	TBX18	194.751	-0.911872	9.20033e-09
ENSG00000158270	COLEC12	531.053	-0.912012	1.34218e-19
ENSG00000184374	COLEC10	100.896	-0.912674	0.000176989
ENSG00000164616	FBXL21	79.8644	-0.914326	0.000881551
ENSG00000171877	FRMD5	84.4644	-0.917411	0.00132881
ENSG00000077943	ITGA8	295.757	-0.91942	1.0427e-11
ENSG00000225573	RPL35P5	116.818	-0.91988	0.000335863
ENSG00000114200	BCHE	64.6765	-0.927944	0.00275888
ENSG00000269821	KCNQ1OT1	48.5222	-0.932724	0.0115166
ENSG00000111341	MGP	123.745	-0.939977	1.28195e-05
ENSG00000198225	FKBP1C	39.0868	-0.945664	0.0309895
ENSG00000081237	PTPRC	120.398	-0.946244	3.18134e-06
ENSG00000165731	RET	78.9789	-0.949703	0.00102274
ENSG00000177409	SAMD9L	185.039	-0.956958	3.4078e-07
ENSG00000000971	CFH	79.7816	-0.95724	0.000363739
ENSG00000079931	MOXD1	58.6112	-0.959182	0.00539896
ENSG00000113657	DPYSL3	1095.25	-0.962534	3.03818e-44
ENSG00000050165	DKK3	1029.5	-0.964981	2.53851e-28
ENSG00000154096	THY1	428.305	-0.966214	1.26571e-18
ENSG00000170629	DPY19L2P2	37.4874	-0.970334	0.0359871
ENSG00000260233	SSSCA1-AS1	42.0988	-0.970691	0.0156648
ENSG00000240376	AC010343.1	83.0527	-0.973387	0.000990147
ENSG00000104368	PLAT	1578.08	-0.980444	1.66199e-58
ENSG00000100918	REC8	182.09	-0.984258	1.53033e-09
ENSG00000205413	SAMD9	131.878	-0.987336	2.99799e-06
ENSG00000204381	LAYN	138.025	-0.98775	1.14637e-06
ENSG00000241741	RPL7AP30	68.3473	-0.998983	0.00274757
ENSG00000145945	FAM50B	45.4339	-1.00053	0.0117777
ENSG00000110427	KIAA1549L	366.197	-1.00187	6.42183e-18
ENSG00000229994	RPL5P4	66.0907	-1.00244	0.00171958
ENSG00000151150	ANK3	41.1701	-1.00876	0.018463
ENSG00000100505	TRIM9	60.8356	-1.00914	0.00335813
ENSG00000128510	CPA4	225.079	-1.01218	2.77009e-12
ENSG00000099282	TSPAN15	94.7093	-1.01355	5.28328e-05
ENSG00000108821	COL1A1	3056.82	-1.02211	6.8093e-20
ENSG00000115648	MLPH	54.1479	-1.02347	0.0042608
ENSG00000283341	AC068205.2	33.078	-1.03423	0.0378029
ENSG00000234648	AL162151.2	75.1185	-1.03538	0.000460633
ENSG00000138185	ENTPD1	169.086	-1.03833	1.42567e-09
ENSG00000115267	IFIH1	74.4982	-1.03846	0.000130185
ENSG00000184347	SLIT3	137.689	-1.04054	3.84699e-06
ENSG00000204941	PSG5	180.979	-1.04445	1.02969e-10
ENSG00000216775	AL109918.1	131.056	-1.05488	6.40984e-07
ENSG00000278905	AC106818.1	32.1814	-1.06141	0.0271745
ENSG00000164188	RANBP3L	51.985	-1.06175	0.00246081
ENSG00000267978	MAGEA9B	37.2536	-1.06541	0.0235942
ENSG00000128656	CHN1	85.2119	-1.06749	2.04731e-05
ENSG00000205181	LINC00654	27.3877	-1.08697	0.0456595
ENSG00000152495	CAMK4	53.5894	-1.09142	0.0011129
ENSG00000133321	RARRES3	47.4045	-1.09394	0.00403001
ENSG00000213928	IRF9	27.5897	-1.09526	0.0445652
ENSG00000137801	THBS1	1132.37	-1.0957	4.94589e-62
ENSG00000178031	ADAMTSL1	27.8485	-1.09791	0.0366716
ENSG00000082126	MPP4	28.7163	-1.10658	0.0492863
ENSG00000267458	AC092069.1	75.4319	-1.13784	2.64533e-05
ENSG00000174059	CD34	33.2316	-1.14306	0.0112866
ENSG00000270885	RASL10B	39.3734	-1.14674	0.0103959
ENSG00000198542	ITGBL1	254.635	-1.15244	2.86051e-15
ENSG00000010438	PRSS3	47.35	-1.16295	0.00131844
ENSG00000077092	RARB	38.5431	-1.1651	0.00516555
ENSG00000107105	ELAVL2	74.6203	-1.17671	2.04731e-05
ENSG00000175899	A2M	185.018	-1.18647	1.17044e-12
ENSG00000122641	INHBA	180.661	-1.19212	9.88799e-11
ENSG00000137965	IFI44	131.248	-1.19237	2.2684e-09
ENSG00000148677	ANKRD1	79.1062	-1.20956	1.59714e-05
ENSG00000189184	PCDH18	30.1602	-1.22381	0.013391
ENSG00000168386	FILIP1L	23.3053	-1.23767	0.0284598
ENSG00000168405	CMAHP	29.8781	-1.26262	0.00963205
ENSG00000166396	SERPINB7	102.084	-1.27707	2.33366e-08
ENSG00000004776	HSPB6	37.1573	-1.28199	0.00169922
ENSG00000040731	CDH10	20.3559	-1.32328	0.0321102
ENSG00000189212	DPY19L2P1	19.3305	-1.3391	0.0473924
ENSG00000163661	PTX3	1643.71	-1.34701	3.06217e-19
ENSG00000138587	MNS1	27.4075	-1.41088	0.00511817
ENSG00000223760	MED15P9	20.2992	-1.41264	0.0189594
ENSG00000227694	RPL23AP74	29.5588	-1.45725	0.00389298
ENSG00000154175	ABI3BP	30.3646	-1.45738	0.00179854
ENSG00000225206	MIR137HG	25.0607	-1.4943	0.0116565
ENSG00000164116	GUCY1A1	15.5697	-1.55176	0.0452375
ENSG00000144057	ST6GAL2	59.9415	-1.5691	8.02157e-08
ENSG00000115461	IGFBP5	805.45	-1.58915	1.18181e-74
ENSG00000226948	RPS4XP2	12.1783	-1.63289	0.0488156
ENSG00000231409	AC018868.1	18.5131	-1.6434	0.01208
ENSG00000107611	CUBN	26.623	-1.66817	0.000814956
ENSG00000260617	AC138028.5	17.3072	-1.72607	0.0163777
ENSG00000268412	TRMT112P6	14.3853	-1.73416	0.0432962
ENSG00000139209	SLC38A4	16.1211	-1.75667	0.0115238
ENSG00000153993	SEMA3D	13.3998	-1.8005	0.0192753
ENSG00000230076	RPL10P6	38.9931	-1.80789	5.54872e-06
ENSG00000148735	PLEKHS1	19.7156	-1.81479	0.00292713
ENSG00000164400	CSF2	17.7635	-1.83969	0.00376721
ENSG00000177932	ZNF354C	9.74166	-1.91182	0.0494606
ENSG00000061918	GUCY1B1	21.5302	-2.09639	0.000191032
ENSG00000246323	AC113382.1	9.95195	-2.13043	0.0199826
ENSG00000187243	MAGED4B	14.6868	-2.15575	0.0193884
ENSG00000137959	IFI44L	13.3512	-2.16125	0.00445604
ENSG00000120337	TNFSF18	26.3346	-2.18119	5.59968e-06
ENSG00000263873	AP003396.5	10.7584	-2.29531	0.00921892

## Sheet: Table 2
Table SII. KEGG pathway enrichment results
ID	Description	Enrichment	Count	P value
hsa04512	ECM-receptor interaction	13	10	6.30957e-09
hsa04510	Focal adhesion	7.3	13	3.16228e-08
hsa04933	AGE-RAGE signaling pathway in diabetic complications	9.1	8	3.16228e-06
hsa04151	PI3K-Akt signaling pathway	4.5	14	3.98107e-06
hsa05144	Malaria	14	6	5.01187e-06
hsa04060	Cytokine-cytokine receptor interaction	4.6	12	1.25893e-05
hsa05146	Amoebiasis	7.8	7	3.16228e-05
hsa04974	Protein digestion and absorption	7.8	7	3.16228e-05
hsa05165	Human papillomavirus infection	4.1	12	3.98107e-05
hsa05171	Coronavirus disease - COVID-19	4.4	9	0.000199526
hsa04514	Cell adhesion molecules	5.1	7	0.000501187
hsa04668	TNF signaling pathway	6	6	0.000501187
hsa05164	Influenza A	4.7	7	0.000794328
hsa04540	Gap junction	6.5	5	0.001
hsa04621	NOD-like receptor signaling pathway	4.3	7	0.00125893
hsa05323	Rheumatoid arthritis	6.1	5	0.00125893
hsa04657	IL-17 signaling pathway	6.1	5	0.00158489
hsa04371	Apelin signaling pathway	4.9	6	0.00158489
hsa05418	Fluid shear stress and atherosclerosis	4.9	6	0.00158489
hsa04350	TGF-beta signaling pathway	5.3	5	0.00251189
hsa05417	Lipid and atherosclerosis	3.7	7	0.00316228
hsa04924	Renin secretion	6.6	4	0.00316228
hsa04630	JAK-STAT signaling pathway	4.1	6	0.00316228
hsa05143	African trypanosomiasis	9.3	3	0.00398107
hsa04810	Regulation of actin cytoskeleton	3.5	7	0.00398107
hsa04611	Platelet activation	4.6	5	0.00501187
hsa04270	Vascular smooth muscle contraction	4.3	5	0.00630957
hsa04610	Complement and coagulation cascades	5.3	4	0.00630957
hsa00604	Glycosphingolipid biosynthesis - ganglio series	15	2	0.00794328
hsa05162	Measles	4.1	5	0.00794328
hsa04970	Salivary secretion	4.9	4	0.01
hsa05205	Proteoglycans in cancer	3.3	6	0.01
hsa05215	Prostate cancer	4.7	4	0.01
hsa04713	Circadian entrainment	4.7	4	0.01
hsa04640	Hematopoietic cell lineage	4.6	4	0.0125893
hsa04064	NF-kappa B signaling pathway	4.4	4	0.0125893
hsa04730	Long-term depression	5.7	3	0.0158489
hsa05200	Pathways in cancer	2.2	10	0.0199526
hsa04927	Cortisol synthesis and secretion	5.3	3	0.0199526
hsa05230	Central carbon metabolism in cancer	4.9	3	0.0251189
hsa04020	Calcium signaling pathway	2.7	6	0.0251189
hsa05223	Non-small cell lung cancer	4.8	3	0.0251189
hsa05218	Melanoma	4.8	3	0.0251189
hsa00230	Purine metabolism	3.6	4	0.0251189
hsa04926	Relaxin signaling pathway	3.5	4	0.0251189
hsa05214	Glioma	4.6	3	0.0251189
hsa04380	Osteoclast differentiation	3.4	4	0.0316228
hsa01521	EGFR tyrosine kinase inhibitor resistance	4.3	3	0.0316228
hsa05135	Yersinia infection	3.3	4	0.0316228
hsa05412	Arrhythmogenic right ventricular cardiomyopathy	4.1	3	0.0398107
hsa04015	Rap1 signaling pathway	2.7	5	0.0398107
hsa04072	Phospholipase D signaling pathway	3.1	4	0.0398107
hsa04921	Oxytocin signaling pathway	3	4	0.0498884
hsa05163	Human cytomegalovirus infection	2.5	5	0.0498884
hsa04010	MAPK signaling pathway	2.3	6	0.0498884
